# Supplementary material
Source: PubMed Central journal article supplement (PMC4808627)
Supplement: NIHMS767956-supplement-Updated_SI.pdf [file NIHMS767956-supplement-Updated_SI.pdf]

# Supporting Information

for

## Donor substrate promiscuity of bacterial $\beta$ 1–3-*N*-acetylglucosaminyltransferases and acceptor substrate flexibility of $\beta$ 1–4-galactosyltransferases

Yanhong Li<sup>a,†</sup>, Mengyang Xue<sup>a,b,c,†</sup>, Xue Sheng<sup>a,d</sup>, Hai Yu<sup>a</sup>, Jie Zeng<sup>a,e</sup>, Vireak Thon<sup>a,f,g</sup>, Yi Chen<sup>a</sup>,  
Musleh M. Muthana<sup>a,h</sup>, Peng G. Wang<sup>b,f</sup>, Xi Chen<sup>a,\*</sup>

<sup>a</sup>Department of Chemistry, University of California-Davis, One Shields Avenue, Davis, CA 95616, USA

<sup>b</sup>National Glycoengineering Research Center and Shandong Province Key Laboratory of Carbohydrate Chemistry and Glycobiology, Shandong University, Jinan, Shandong 250100, China

<sup>c</sup>Current address: Shandong Province Key Laboratory of Emergency and Critical Care Medicine, Shandong University, Jinan, Shandong 250100, China

<sup>d</sup>Current address: Department of Chemistry and Biochemistry, University of California, San Diego, CA 92093, USA

<sup>e</sup>School of Food Science, Henan Institute of Science and Technology, Xinxiang, Henan 453003, China

<sup>f</sup>Department of Chemistry, Georgia State University, Atlanta, GA 30303, USA

<sup>g</sup>Current address: Laboratory of Bacterial Polysaccharides, Food and Drug Administration, Bethesda, MD 20892, USA

<sup>h</sup>Current address: Children's National Medical Center, Washington DC, 20010, USA

\*Corresponding author. Mailing address: Department of Chemistry, One Shields Avenue, Davis, CA 95616, USA. Phone: 530-754-6037. Fax: 530-752-8995. E-mail: xiichen@ucdavis.edu

† These authors contributed equally.

### Contents

|                                                                                                                                                                       |        |
|-----------------------------------------------------------------------------------------------------------------------------------------------------------------------|--------|
| <b>Figure S1.</b> SDS-PAGE analysis of B $\beta$ 4GalT.....                                                                                                           | S2     |
| <b>Figure S2.</b> Metal effects of Hp $\beta$ 3GlcNAcT (A) and NmLgtA (B).....                                                                                        | S2     |
| <b>Figure S3.</b> Sugar nucleotides and derivatives used for the donor substrate specificity studies of Hp $\beta$ 3GlcNAcT and NmLgtA.....                           | S3     |
| <b>Figure S4.</b> Protein sequence alignment of Hp $\beta$ 4GalT, NmLgtB, and B $\beta$ 4GalT.....                                                                    | S3     |
| <b>Figure S5.</b> High resolution mass spectrometry analysis of the acceptor substrate specificities of Hp $\beta$ 4GalT, NmLgtB, and B $\beta$ 4GalT.....            | S4–S11 |
| <b>Table S2.</b> <sup>13</sup> C NMR chemical shift assignment of Lac $\beta$ ProN <sub>3</sub> and GalNAc $\beta$ 1–3Lac $\beta$ ProN <sub>3</sub> ( <b>1</b> )..... | S12    |
| <b>Table S3.</b> <sup>13</sup> C NMR chemical shift assignment of Lac and Gal $\beta$ 1–3Lac ( <b>2</b> ).....                                                        | S13    |
| <sup>1</sup> H and <sup>13</sup> C NMR spectra of GalNAc $\beta$ 1–3Gal $\beta$ 1–4Glc $\beta$ ProN <sub>3</sub> ( <b>1</b> ).....                                    | S14    |
| <sup>1</sup> H and <sup>13</sup> C NMR spectra of Gal $\beta$ 1–3Gal $\beta$ 1–4Glc ( <b>2</b> ).....                                                                 | S15    |
| References.....                                                                                                                                                       | S16    |

**Figure S1.** SDS-PAGE (4–20% Tris-Glycine gel) analysis of B $\beta$ 4GalT. Lanes: BI, whole cell extract before induction; AI, whole cell extract after induction; L, lysate after induction; PP, Ni<sup>2+</sup>-NTA column purified protein; M, protein markers (Bio-Rad precision Plus Protein Standards, 10–250 kDa).

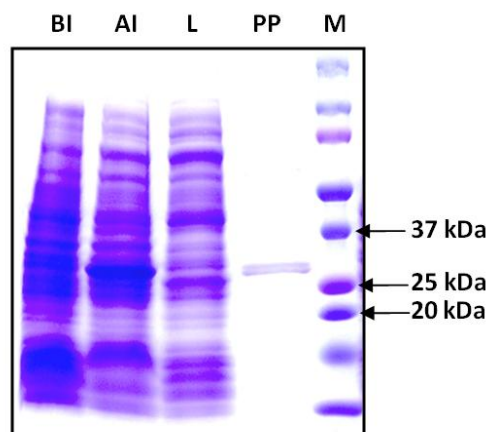

**Figure S2.** Metal effect of Hp $\beta$ 3GlcNAcT (A) and NmLgtA (B). *Gray columns*, MnCl<sub>2</sub>; *white columns*, MgCl<sub>2</sub>; *black columns*, CaCl<sub>2</sub>. The reactions were carried out with the addition of different concentrations (1, 5, 10, and 20 mM) of different metal ions (MgCl<sub>2</sub>, MnCl<sub>2</sub>, CaCl<sub>2</sub>) or EDTA (10 mM) in Tris-HCl buffer (100 mM, pH 8.0) containing UDP-GlcNAc (1 mM), Lac $\beta$ MU (1 mM), and Hp $\beta$ 3GlcNAcT (3  $\mu$ g) or NmLgtA (2  $\mu$ g). Reactions were performed at 30 °C for 10 min. The reaction without metal ion nor EDTA was used as a control.

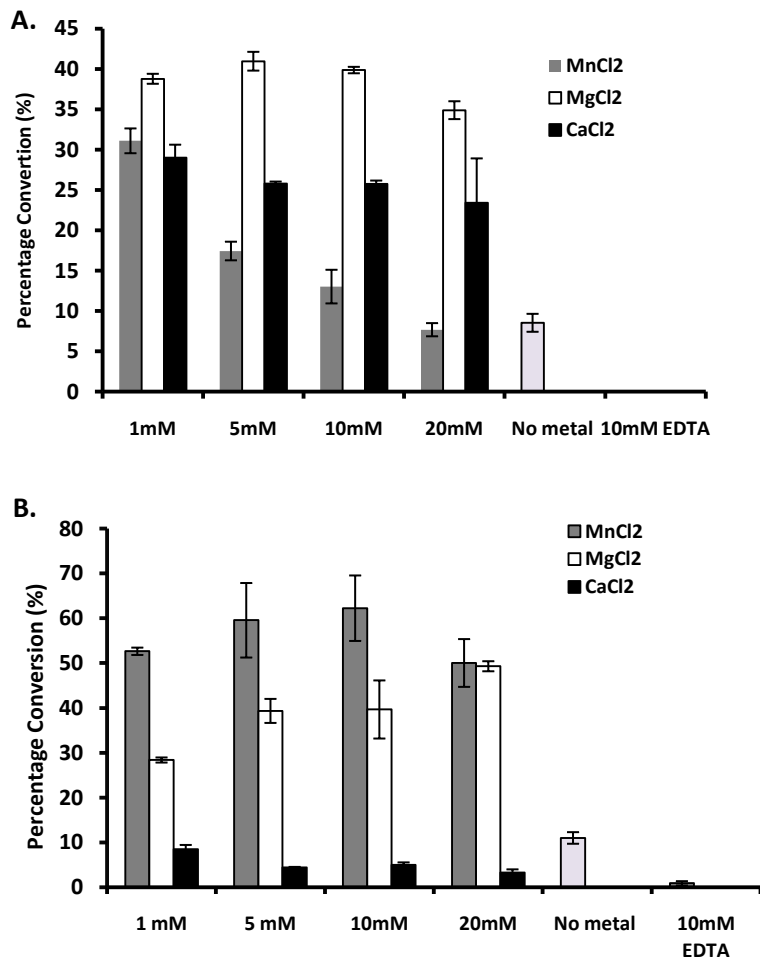

**Figure S3.** Sugar nucleotides and derivatives<sup>1-6</sup> used for donor substrate specificity studies of Hpβ3GlcNAcT and NmLgtA.

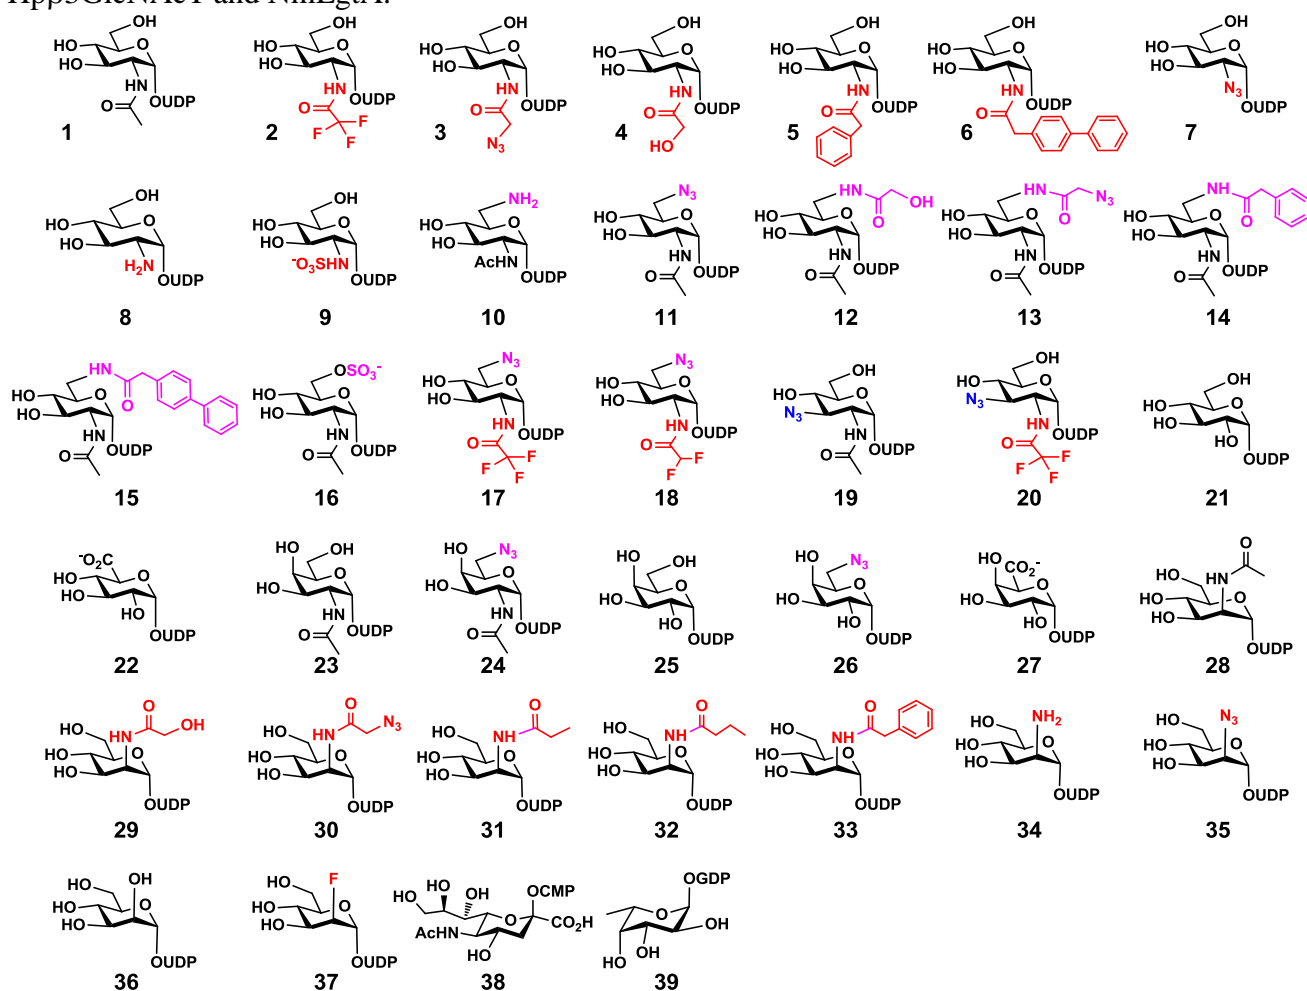

**Figure S4.** Protein sequences alignment of Hpβ4GalT, NmLgtB, and Bβ4GalT analyzed by software of ClustalW2 and GeneDoc.

```

Hpβ1-4GalT : MRVFAISLN-----QKVDITFG---LVFRDTTTTLLNSINATHHCAQIFDAIYSKTFEGGLHP : 54
NmLgtB      : MQNHVISIASAAERRAHIADTFGRHGIPFQFFDAIMPSEITECAMAE LVPGLSAHPYLSGVEK : 63
Bβ1-4GalT   : MRSLTACPEESPLLVGFMLEIFN-IPVDLKLVEQQNPKVKITG-GRYTFMDCISPHKVAIIIPF : 61

Hpβ1-4GalT : LVKKHLHPYFITQNIKLMGITNLISEVSKFYAALKYHAKFMSLGLGICYASHYSLWEKCIEL : 117
NmLgtB      : ACFMSPAVLWKQALDEGLPYITVFEDDVLGEGAEEKFLAELAWLQER--FDPDTAFIVRLETM : 124
Bβ1-4GalT   : RNRQEHLLKYWLYYHPITLQRQLDYGIYVINQAGEISMFNRAKLINVG-----EKKALKDY : 116

Hpβ1-4GalT : NEAICILEDDITLKEDFKEGLDLFLKHIQELGYIRIMHLLYDASVKSEPLSHKNHEIQERVG : 179
NmLgtB      : --FMHVITSPSGVADYCGRAFPLESEHWGTAGYIISRKAMRFFLDREAAIPPEGLHPVD-IM : 184
Bβ1-4GalT   : DYNCFVFSLDVLI FPMNDHNTYRCFS-QPRHISVAMDKFGSLPYVQYGGVSALSQQFLSIN : 178

Hpβ1-4GalT : IIKAYSEGVTQGYVITFKIAKVELKCSRKWVVPVDTIMDATFIHG-VKNLVLQPEVIADDEQ : 241
NmLgtB      : MFSDFDREGMPVCQLNEAICAQELHYAKFHDQ--NSALGSLIEHDLRLNKRQORRDSFANTF : 245
Bβ1-4GalT   : GEPNNYWGCGEDDDIYNRLA FRGMSVSRPNAVIGKCRVIR-HSRDKKNEPNEQRFDRIAHTK : 240

Hpβ1-4GalT : ISTIARKEEPYSPKIALMRELHFYKLYWQFV--- : 273
NmLgtB      : KHRLIFALTKISREREKRQRREQFIVPFG----- : 275
Bβ1-4GalT   : ETMLSDGINSLTVMVLEVQRYPLYTKITVDIGTPS : 275
    
```

**Figure S5.** HRMS analysis of the acceptor substrate specificities of Hp4GalT, NmLgtB, and B $\beta$ 4GalT using products obtained from NmLgtA or Hp $\beta$ 3GlcNAcT-catalyzed reactions. Starting materials and products (m/z values) are shown in red circles. Reference m/z values are shown in green circles. Estimated yields are shown.

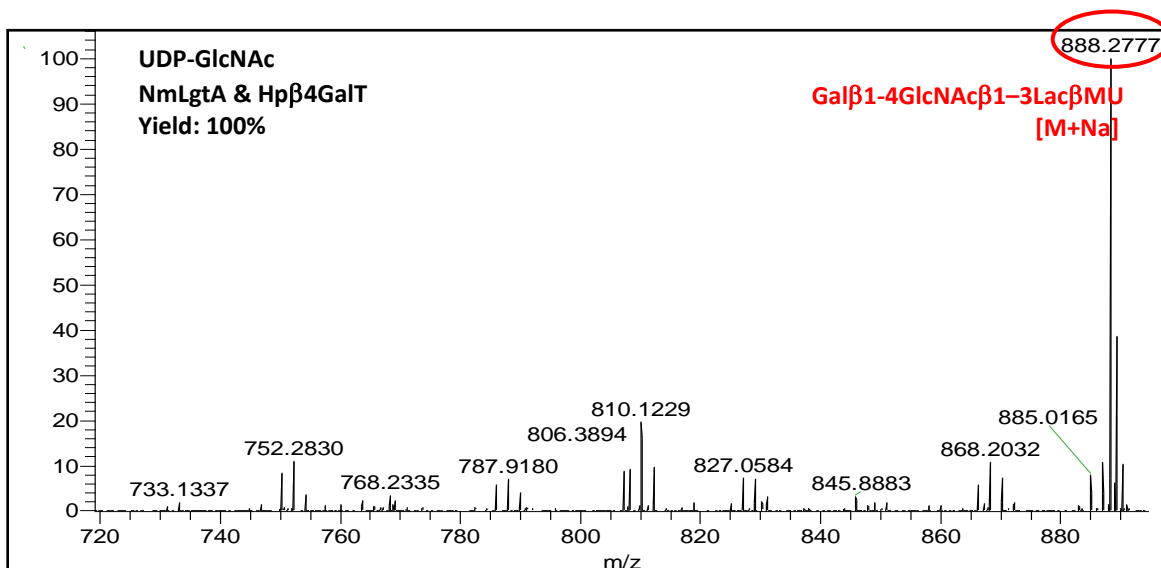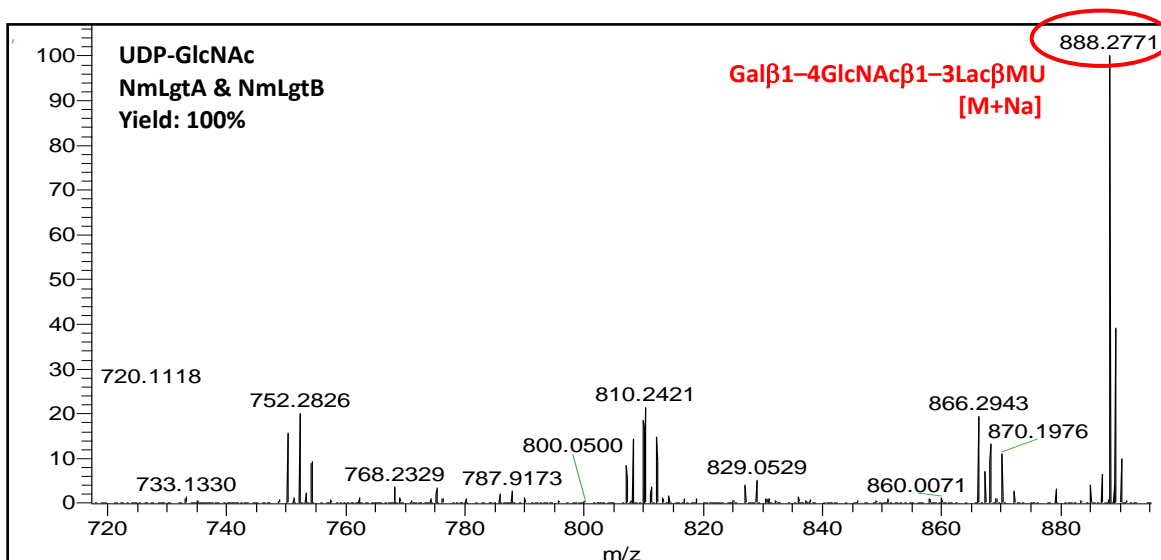

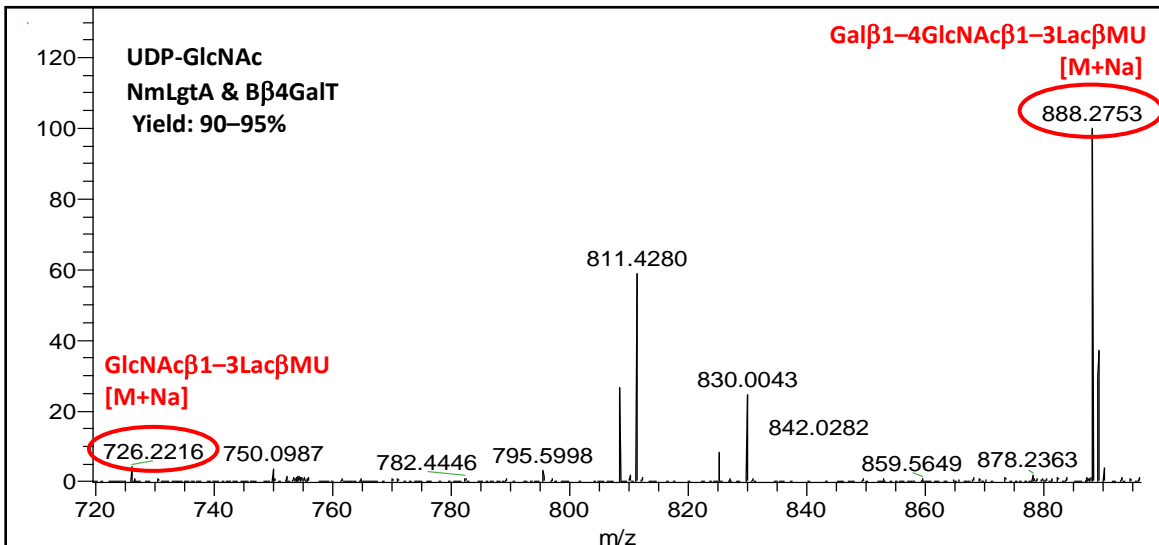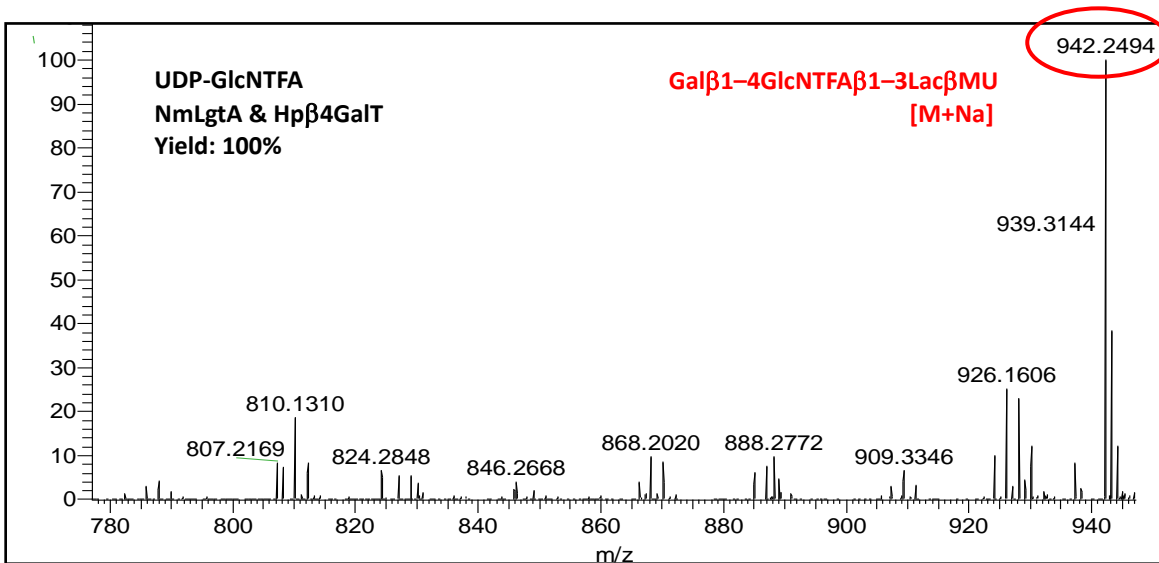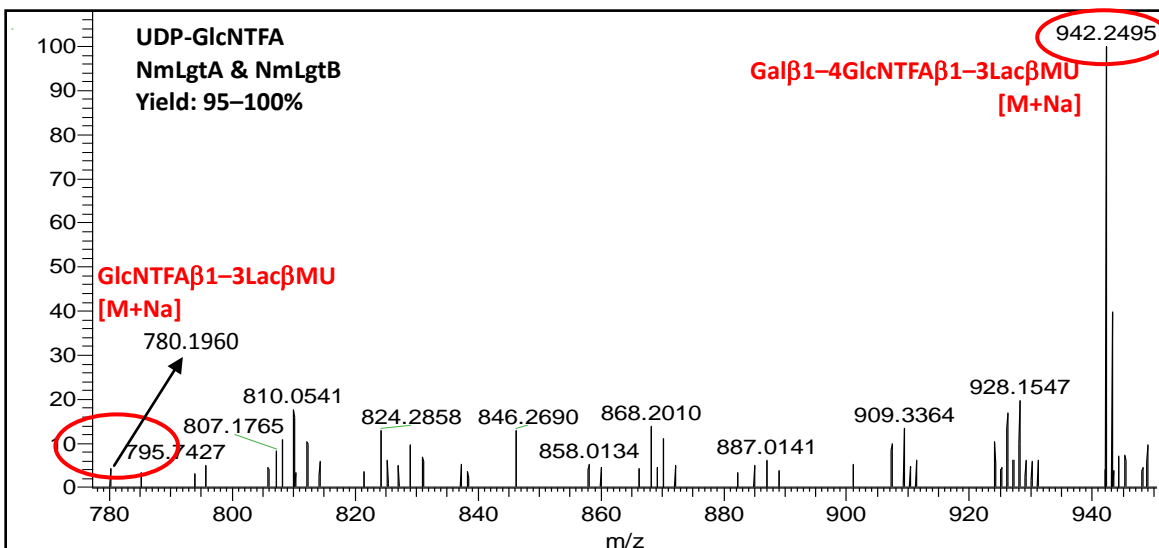

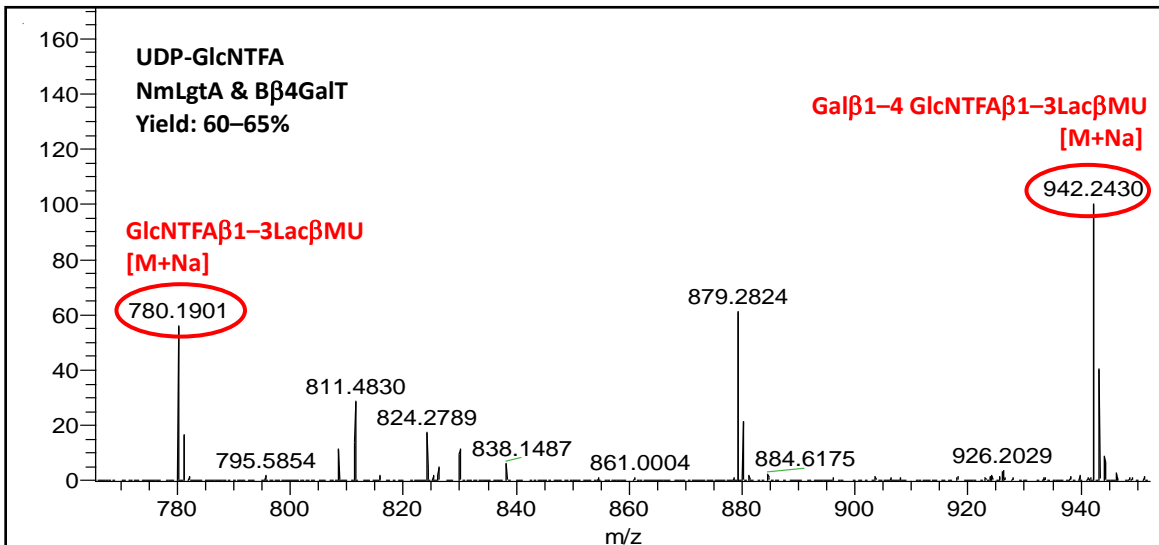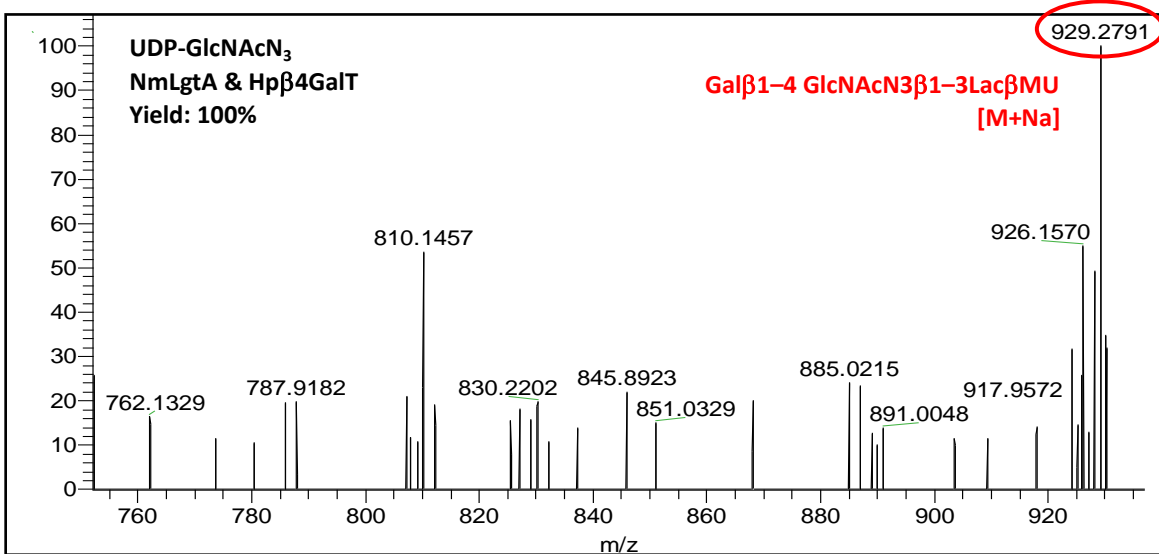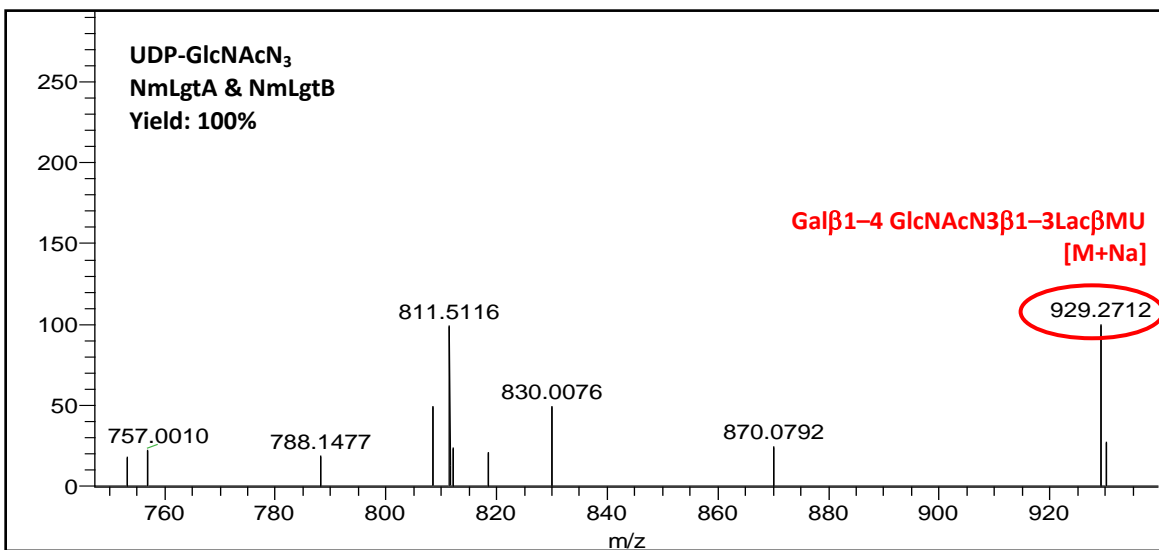

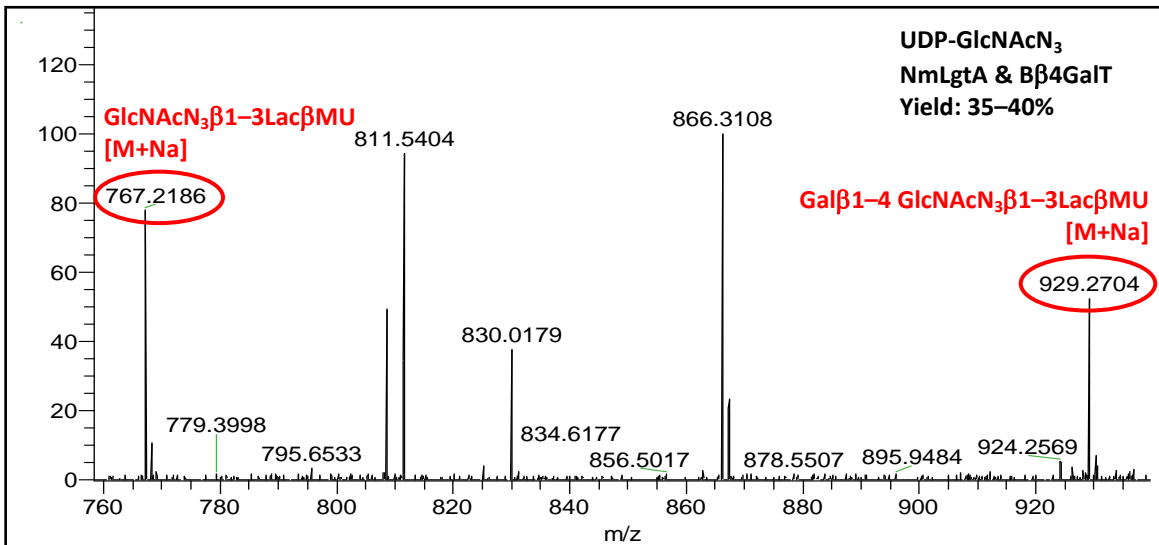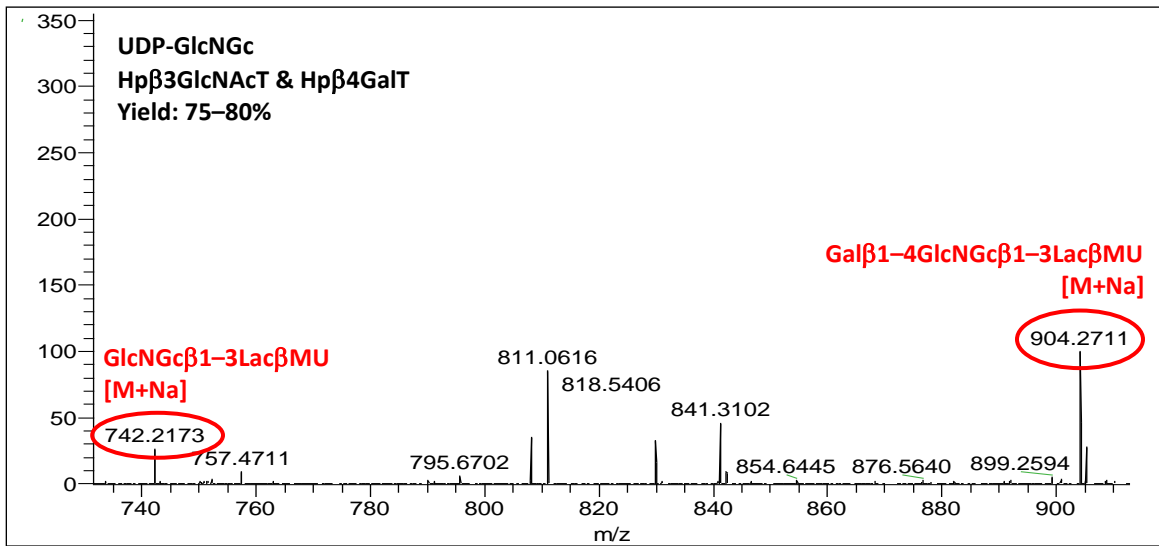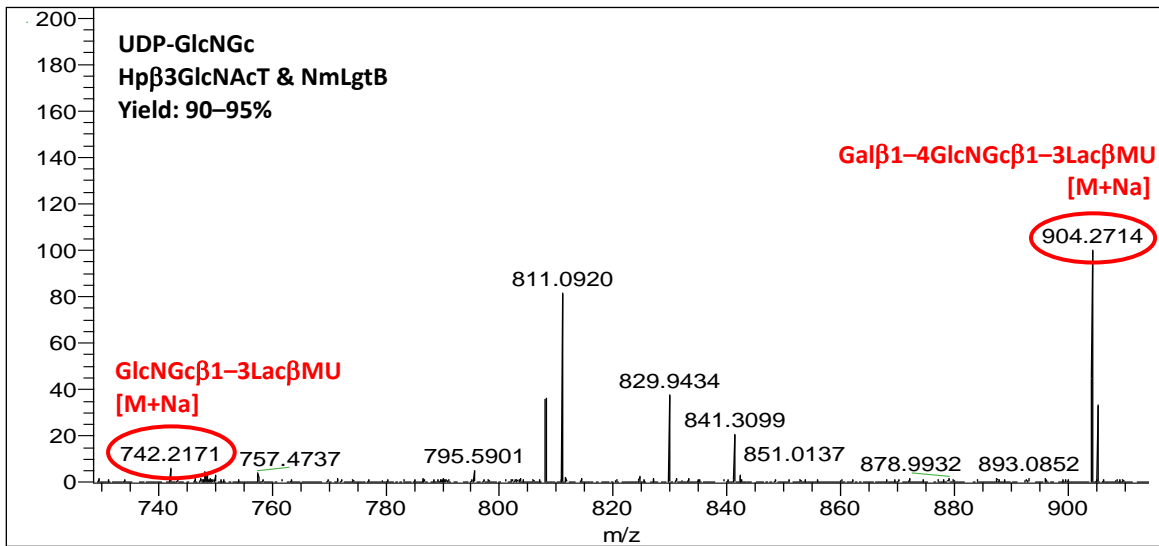

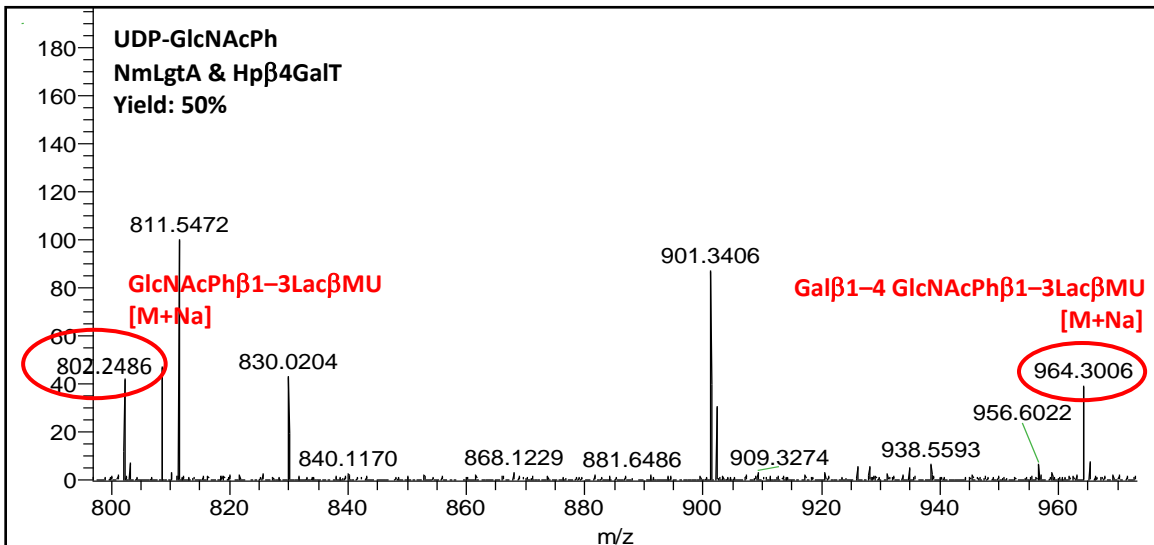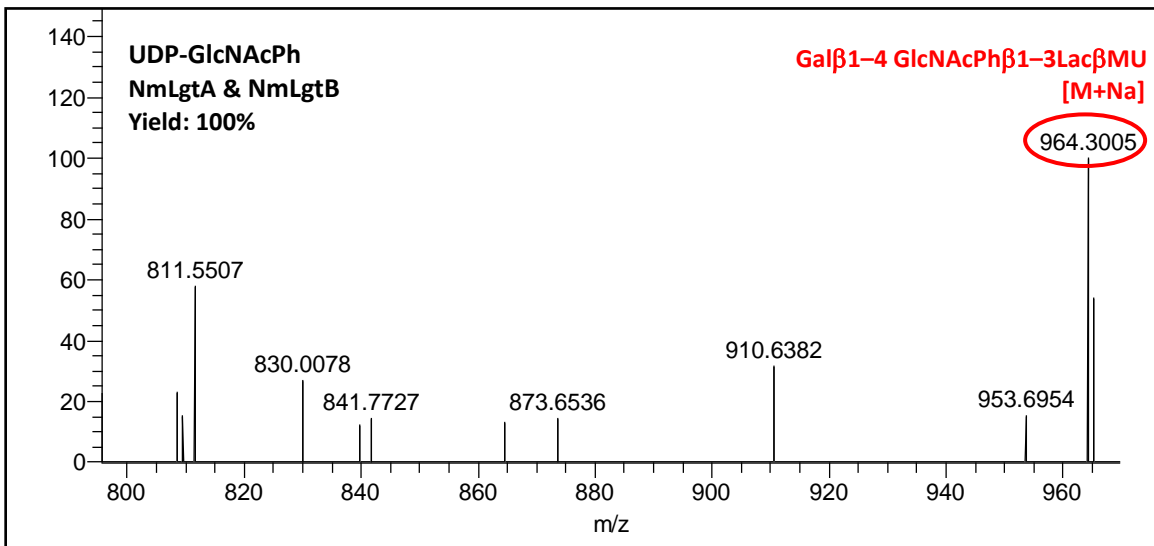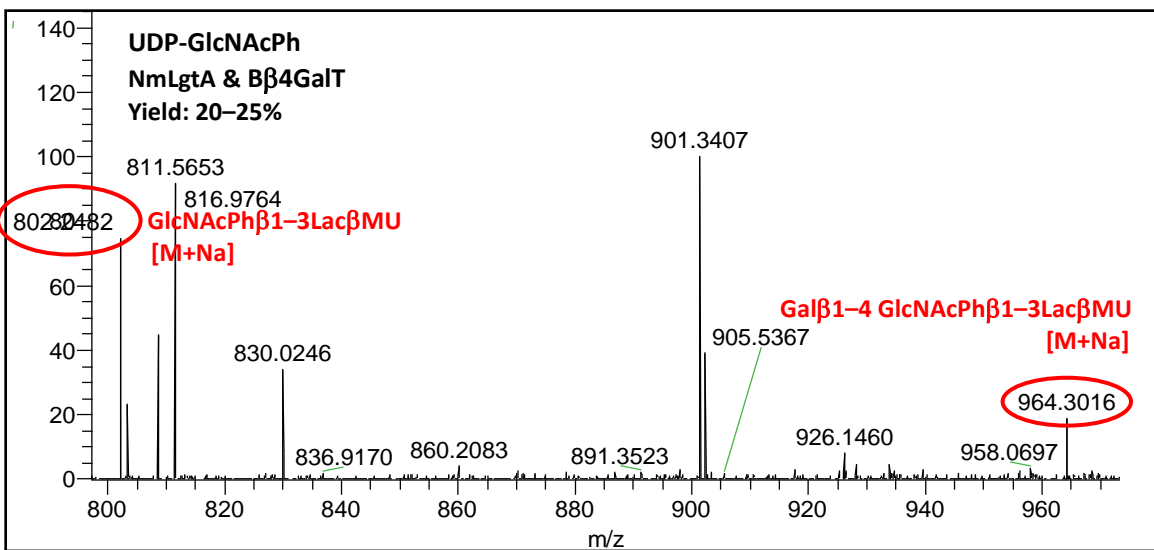



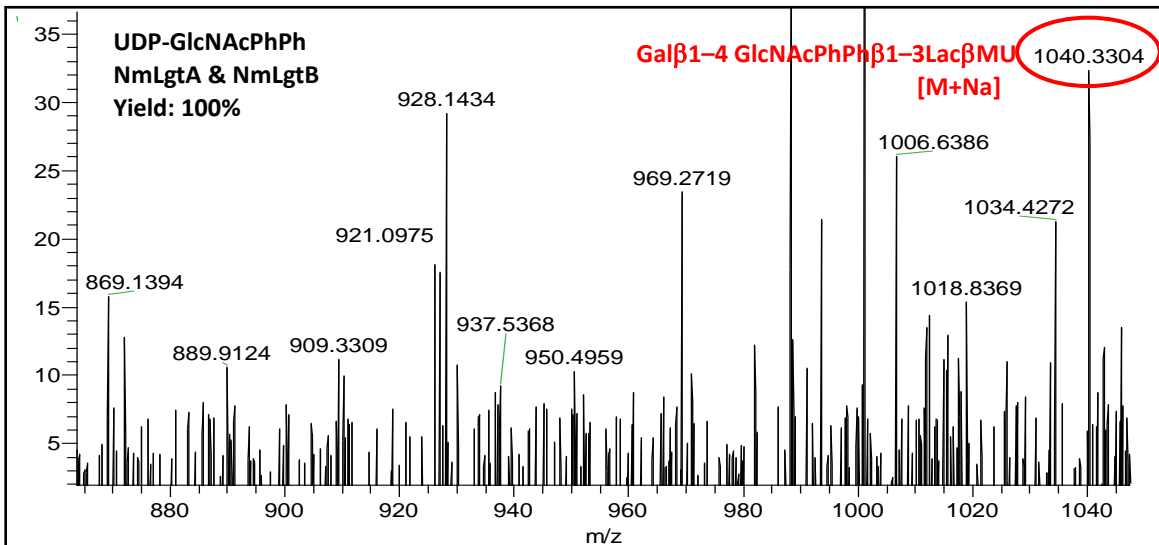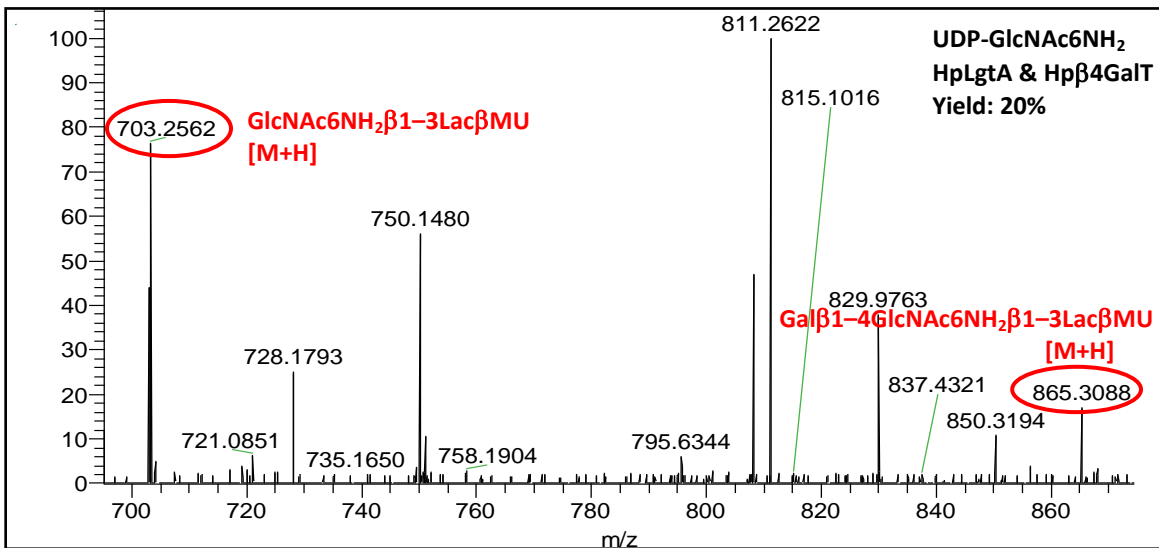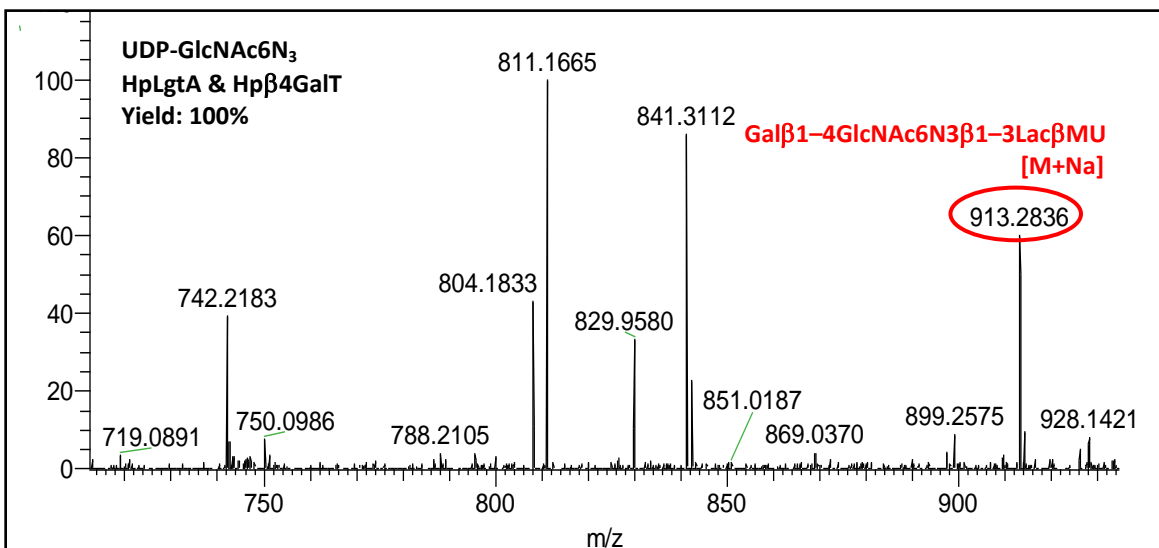

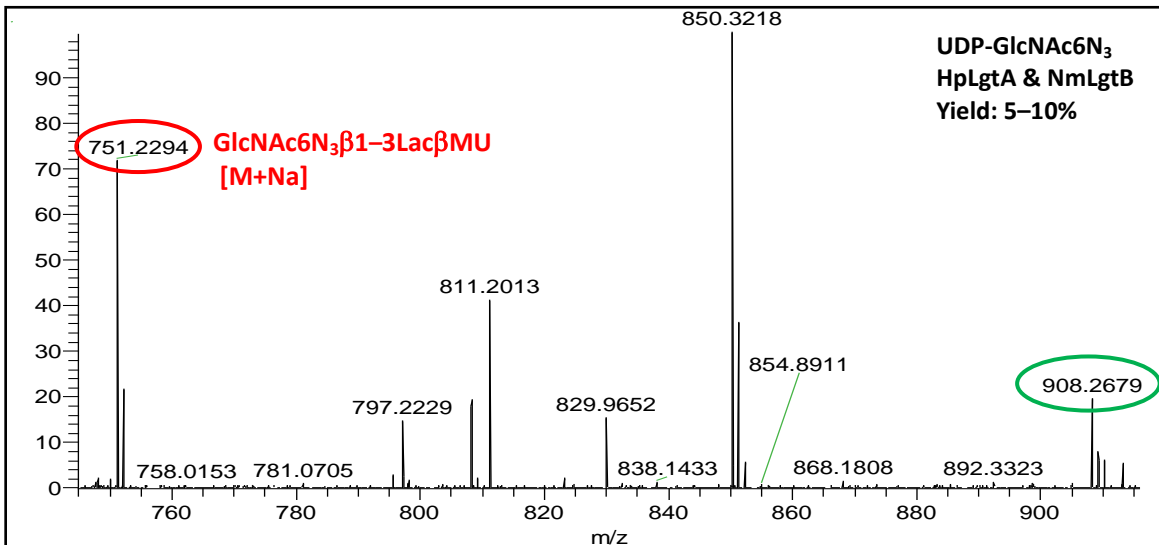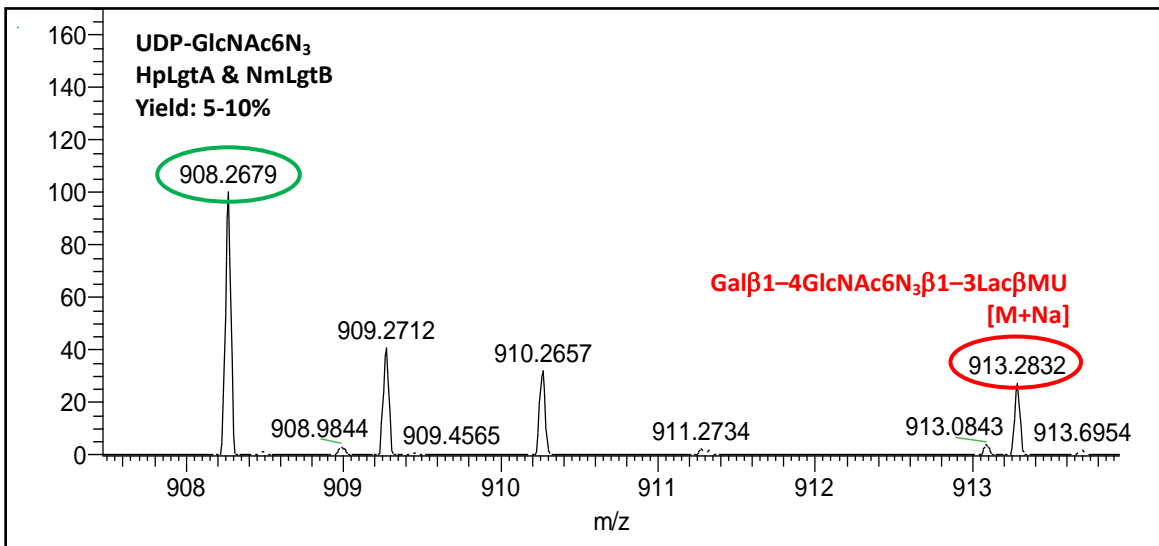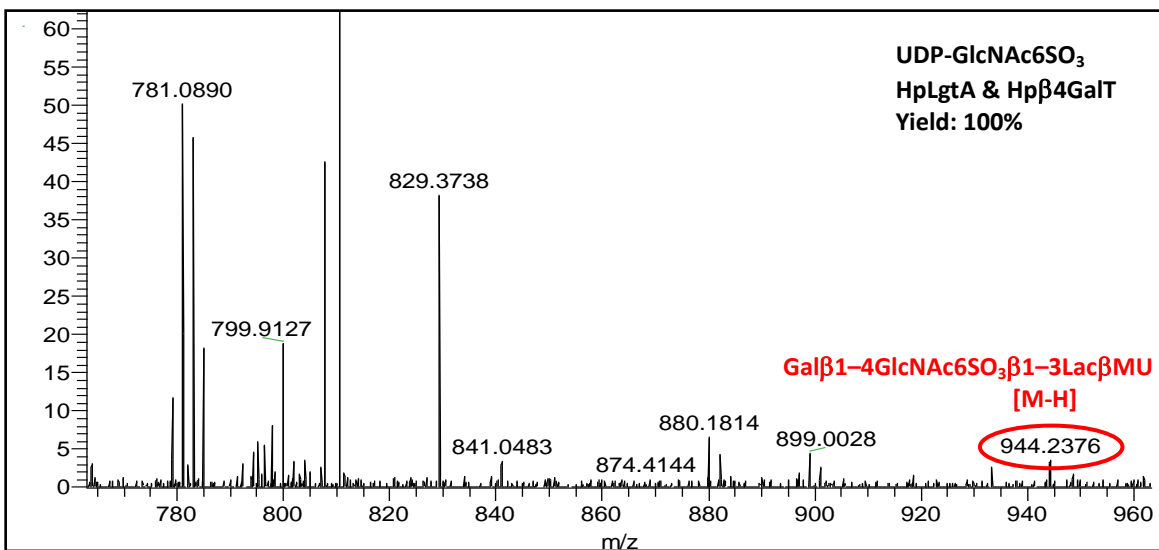

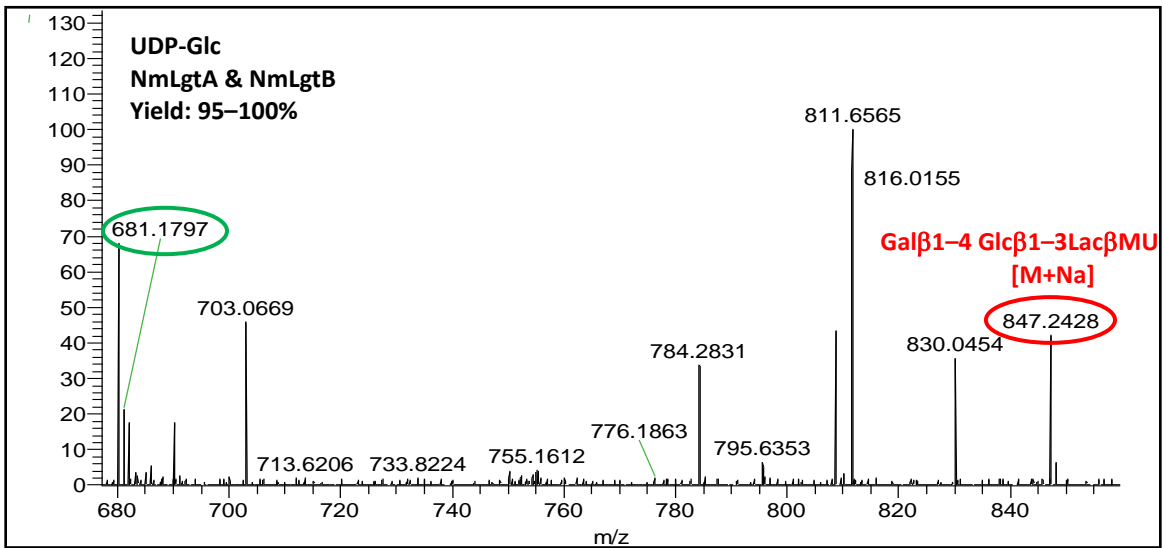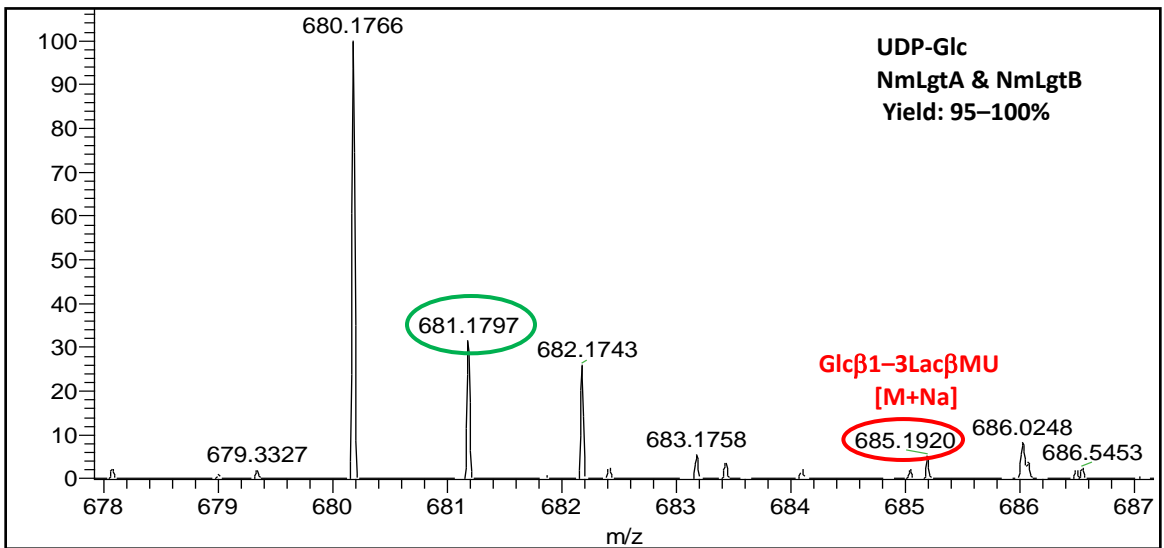

**Table S1.**  $^{13}\text{C}$  NMR chemical shifts assignment of Lac $\beta$ ProN $_3$  (Gal $\beta$ 1–4Glc $\beta$ ProN $_3$ ) and GalNAc $\beta$ 1–3Gal $\beta$ 1–4Glc $\beta$ ProN $_3$  (**1**).

| Residue             | Carbon atom                                            | Chemical shift (ppm)  |                                                                     |
|---------------------|--------------------------------------------------------|-----------------------|---------------------------------------------------------------------|
| $\beta$ Glc         | C                                                      | Lac $\beta$ ProN $_3$ | GalNAc $\beta$ 1–3Gal $\beta$ 1–4Glc $\beta$ ProN $_3$ ( <b>1</b> ) |
|                     | 1                                                      | 101.99                | 101.97                                                              |
|                     | 2                                                      | 72.67                 | 72.65                                                               |
|                     | 3                                                      | 74.23                 | 74.22                                                               |
|                     | 4                                                      | 78.22                 | 78.20                                                               |
|                     | 5                                                      | 74.64                 | 74.63                                                               |
| $\beta$ Gal(1-4)    | 6                                                      | 59.92                 | 59.92                                                               |
|                     | 1                                                      | 102.79                | 102.81                                                              |
|                     | 2                                                      | 70.82                 | 69.93                                                               |
|                     | <b>3</b>                                               | <b>72.37</b>          | <b>81.63</b>                                                        |
|                     | 4                                                      | 68.41                 | 67.61                                                               |
|                     | 5                                                      | 75.22                 | 74.84                                                               |
| $\beta$ GalNAc(1-3) | 6                                                      | 60.89                 | 60.82                                                               |
|                     | 1                                                      |                       | 103.20                                                              |
|                     | 2                                                      |                       | 69.93                                                               |
|                     | 3                                                      |                       | 70.59                                                               |
|                     | 4                                                      |                       | 68.34                                                               |
|                     | 5                                                      |                       | 74.74                                                               |
| ProN $_3$           | 6                                                      |                       | 60.85                                                               |
|                     | C=O                                                    | 174.61                | 175.03                                                              |
|                     | CH $_3$                                                | 22.37                 | 22.09                                                               |
|                     | O $\underline{\text{C}}$ H $_2$ CH $_2$ CH $_2$ N $_3$ | 67.24                 | 67.23                                                               |
|                     | OCH $_2$ $\underline{\text{C}}$ H $_2$ CH $_2$ N $_3$  | 28.10                 | 28.10                                                               |
|                     | OCH $_2$ CH $_2$ $\underline{\text{C}}$ H $_2$ N $_3$  | 47.73                 | 47.73                                                               |

**Table S2.**  $^{13}\text{C}$  NMR chemical shifts assignment of Lac (Gal $\beta$ 1–4Glc) and Gal $\beta$ 1–3Gal $\beta$ 1–4Glc (**2**).

| Residue          | Carbon atom | Chemical shift (ppm)    |                                                                    |
|------------------|-------------|-------------------------|--------------------------------------------------------------------|
| $\beta$ Glc      | C           | Lac ( $\alpha$ -isomer) | Gal $\beta$ 1–3Gal $\beta$ 1–4Glc ( $\alpha$ -isomer) ( <b>2</b> ) |
|                  | 1           | 91.68                   | 91.70                                                              |
|                  | 2           | 71.28                   | 71.27                                                              |
|                  | 3           | 71.01                   | 71.03                                                              |
|                  | 4           | 78.27                   | 78.08                                                              |
|                  | 5           | 69.97                   | 68.43                                                              |
| $\beta$ Gal(1–4) | 6           | 60.92                   | 60.87                                                              |
|                  | 1           | 102.75                  | 102.39                                                             |
|                  | 2           | 70.83                   | 69.95                                                              |
|                  | <b>3</b>    | <b>72.38</b>            | <b>81.75</b>                                                       |
|                  | 4           | 68.43                   | 68.28                                                              |
|                  | 5           | 75.22                   | 74.65                                                              |
| $\beta$ Gal(1–3) | 6           | 59.94                   | 59.80                                                              |
|                  | 1           |                         | 104.21                                                             |
|                  | 2           |                         | 70.07                                                              |
|                  | 3           |                         | 72.36                                                              |
|                  | 4           |                         | 68.30                                                              |
|                  | 5           |                         | 74.85                                                              |
|                  | 6           |                         | 59.94                                                              |

$^1\text{H}$  and  $^{13}\text{C}$  NMR spectra of GalNAc $\beta$ 1-3Gal $\beta$ 1-4Glc $\beta$ ProN $_3$  (**1**)

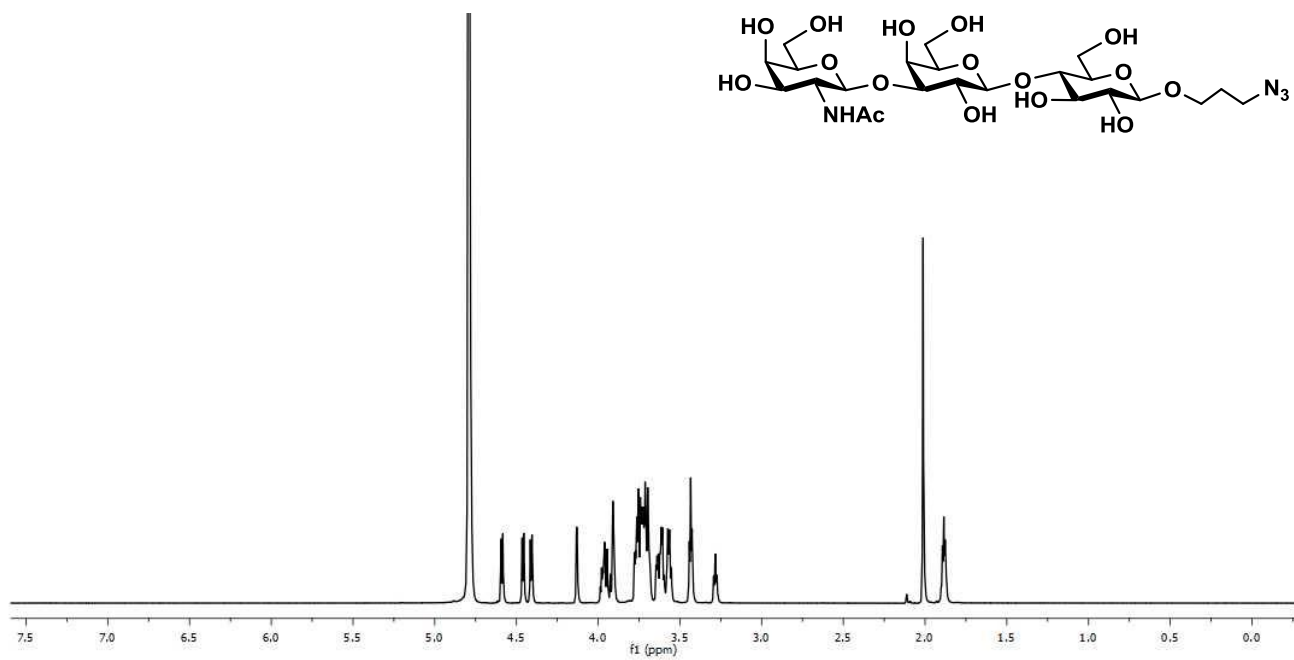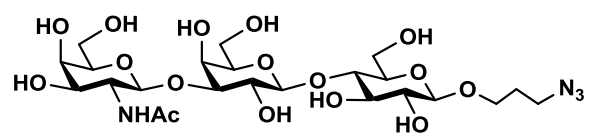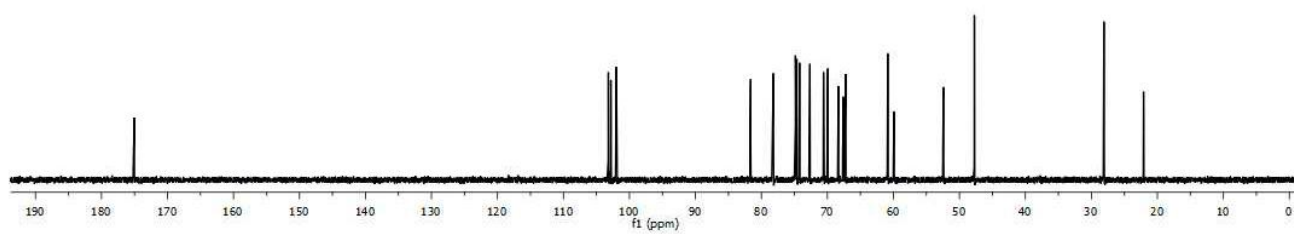

$^1\text{H}$  and  $^{13}\text{C}$  NMR spectra of Gal $\beta$ 1-3Gal $\beta$ 1-4Glc (2)

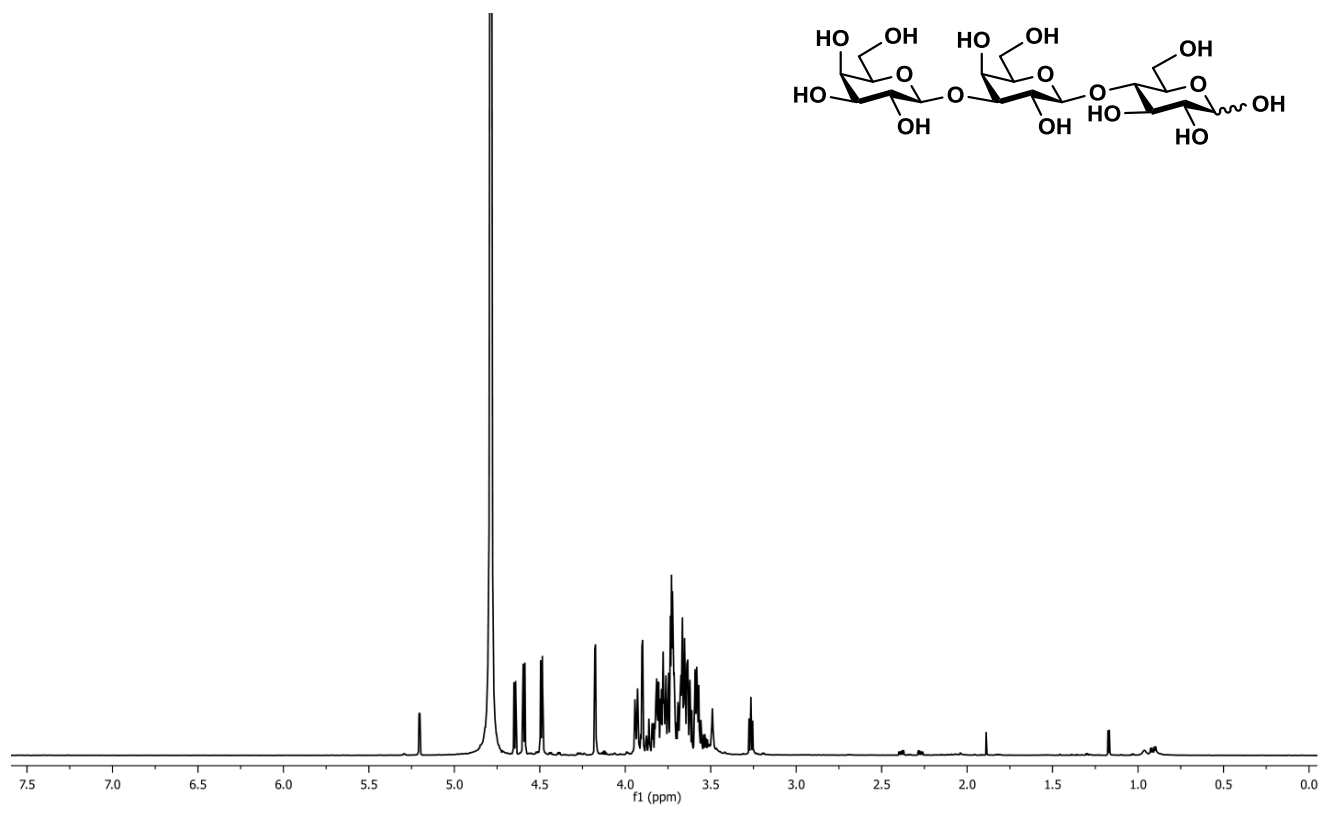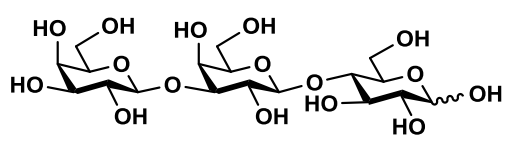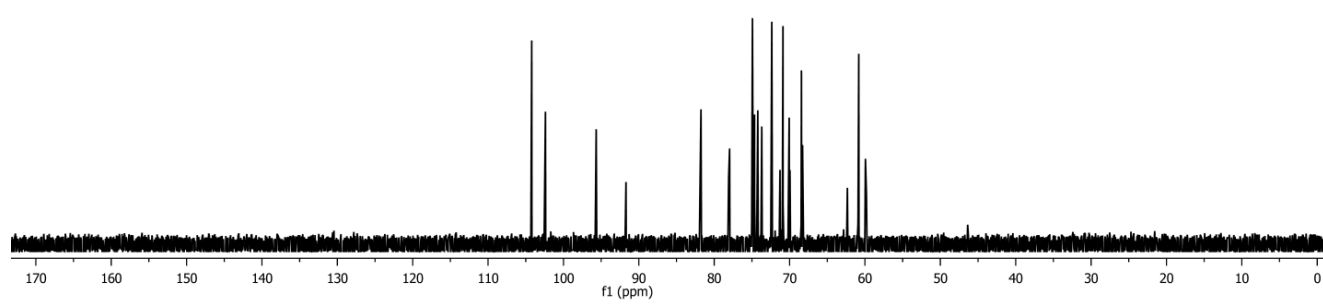

## References:

1. Chen, Y.; Thon, V.; Li, Y.; Yu, H.; Ding, L.; Lau, K.; Qu, J.; Hie, L.; Chen, X. *Chem. Commun.* **2011**, *47*, 10815.
2. Muthana, M. M.; Qu, J.; Li, Y.; Zhang, L.; Yu, H.; Ding, L.; Malekan, H.; Chen, X. *Chem. Commun.* **2012**, *48*, 2728.
3. Zhang, L.; Muthana, M. M.; Yu, H.; McArthur, J. B.; Qu, J.; Chen, X. *Carbohydr. Res.* **2016**, *419*, 18.
4. Muthana, M. M.; Qu, J.; Xue, M.; Klyuchnik, T.; Siu, A.; Li, Y.; Zhang, L.; Yu, H.; Li, L.; Wang, P. G.; Chen, X. *Chem. Commun.* **2015**, *51*, 4595.
5. Yu, H.; Yu, H.; Karpel, R.; Chen, X. *Bioorg. Med. Chem.* **2004**, *12*, 6427.
6. Zhang, L.; Lau, K.; Cheng, J.; Yu, H.; Li, Y.; Sugiarto, G.; Huang, S.; Ding, L.; Thon, V.; Wang, P. G.; Chen, X. *Glycobiology* **2010**, *20*, 1077.
